# Supplementary material
Source: ML conference proceedings conference paper supplement (https://proceedings.mlr.press/v33/oliva14a.html)
Supplement: Supplementary file [file oliva14a-supp.pdf]

## Appendix

## Details on Bound (24)

$$\begin{aligned}
 & \frac{1}{2} \mathbb{E}_{P_0} \left[ \left( f(P_0) - \beta^T Z(\hat{P}_0) \right)^2 \right] \\
 &= \frac{1}{2} \psi^T \Sigma \psi + \mathbb{E}_{P_0} \left[ \varsigma_0 Z(\hat{P}_0)^T \right] \psi + \frac{1}{2} \mathbb{E}_{P_0} [\varsigma_0^2] \\
 & \quad - \frac{1}{2} \psi^T \Sigma \psi - \mathbb{E}_{P_0} \left[ \varsigma_0 Z(\hat{P}_0)^T \right] \Sigma^+ \Sigma \psi \\
 & \quad - \frac{1}{2} \mathbb{E}_{P_0} \left[ \varsigma_0 Z(\hat{P}_0)^T \right] \Sigma^+ \mathbb{E}_{P_0} \left[ \varsigma_0 Z(\hat{P}_0) \right] \\
 & \leq \frac{1}{2} \mathbb{E}_{P_0} [\varsigma_0^2] + \mathbb{E}_{P_0} \left[ \varsigma_0 Z(\hat{P}_0)^T (\psi - \Sigma^+ \Sigma \psi) \right],
 \end{aligned}$$

since  $\Sigma^+$  is PSD. Let  $\Sigma = USU^{-1}$  be the eigen-decomposition of  $\Sigma$ ; i.e.  $S$  is diagonal matrix of decreasing eigenvalues and  $U$  is a real unitary matrix and  $U^{-1} = U^T$ . Then,  $\Sigma^+ = US^+U^{-1}$ , where  $S^+$  is the diagonal matrix where  $(S^+)_{ii} = 1/(S)_{ii}$  if  $(S)_{ii} \neq 0$  and  $(S^+)_{ii} = 0$  if  $(S)_{ii} = 0$ . Furthermore, let  $r = \text{rank}(\Sigma)$ , and  $I_r$  be the diagonal matrix with  $(I_r)_{ii} = 1$  for  $i \leq r$  and  $(I_r)_{ii} = 0$  for  $i > r$ . Hence:

$$\begin{aligned}
 \|\Sigma^+ \Sigma \psi\|_2^2 &= \psi^T \Sigma \Sigma^+ \Sigma^+ \Sigma \psi \\
 &= \psi^T U S U^{-1} U S^+ U^{-1} U S^+ U^{-1} U S U^{-1} \psi \\
 &= \psi^T U I_r U^{-1} \psi \\
 &\leq \psi^T U I U^{-1} \psi \\
 &\leq \|\psi\|_2^2.
 \end{aligned}$$

Furthermore,

$$\|\psi\|_2 \leq \sum_{i=1}^{\infty} |\theta_i| \|Z(G_i)\|_2 \leq \sqrt{2}B.$$

Hence,

$$\begin{aligned}
 & \frac{1}{2} \mathbb{E}_{P_0} \left[ \left( f(P_0) - \beta^T Z(\hat{P}_0) \right)^2 \right] \\
 & \leq \frac{1}{2} \mathbb{E}_{P_0} [\varsigma_0^2] + \mathbb{E}_{P_0} \left[ \varsigma_0 Z(\hat{P}_0)^T (\psi - \Sigma^+ \Sigma \psi) \right] \\
 & \leq \frac{1}{2} \mathbb{E}_{P_0} [\varsigma_0^2] + \mathbb{E}_{P_0} \left[ |\varsigma_0| \|Z(\hat{P}_0)^T (\psi - \Sigma^+ \Sigma \psi)\| \right] \\
 & \leq \frac{1}{2} \mathbb{E}_{P_0} [\varsigma_0^2] + \mathbb{E}_{P_0} \left[ |\varsigma_0| \|Z(\hat{P}_0)\|_2 \|\psi - \Sigma^+ \Sigma \psi\|_2 \right] \\
 & \leq \frac{1}{2} \mathbb{E}_{P_0} [\varsigma_0^2] + \sqrt{2} (\|\psi\|_2 + \|\Sigma^+ \Sigma \psi\|_2) \mathbb{E}_{P_0} [|\varsigma_0|] \\
 & \leq \frac{1}{2} \mathbb{E}_{P_0} [\varsigma_0^2] + \sqrt{2} (\|\psi\|_2 + \|\psi\|_2) \mathbb{E}_{P_0} [|\varsigma_0|] \\
 & \leq \frac{1}{2} \mathbb{E}_{P_0} [\varsigma_0^2] + \sqrt{2} (2\sqrt{2}B) \mathbb{E}_{P_0} [|\varsigma_0|] \\
 & \leq \frac{1}{2} \mathbb{E}_{P_0} [\varsigma_0^2] + 4B \sqrt{\mathbb{E}_{P_0} [\varsigma_0^2]},
 \end{aligned}$$

where the last line follows from Jensen's inequality.

## GMM Figures

See Figure 5.

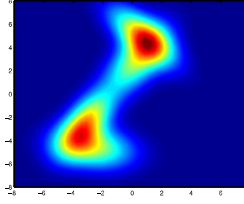

(a)  $k = 4$  True Density

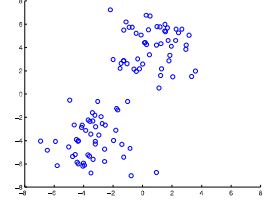

(b)  $k = 4, n = 100$  Points

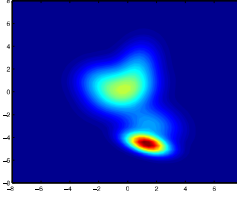

(c)  $k = 5$  True Density

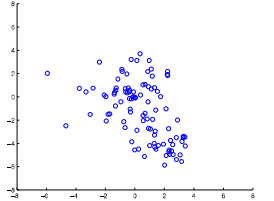

(d)  $k = 5, n = 100$  Points

Figure 5: Typical GMMs generated in our datasets as well as their corresponding samples. One can see that it would be hard for even a human to predict the true number of components, yet the Double-Basis estimator does a good job.

## Density Estimation Details

Let  $M_t = \{\alpha : \kappa_\alpha(\nu, \gamma) \leq t\} = \{\alpha_1, \dots, \alpha_S\}$ . First note that:

$$\begin{aligned}
 & \mathbb{E} [\|p_i - \tilde{p}_i\|_2^2] \\
 &= \mathbb{E} \left[ \left\| \sum_{\alpha \in \mathbb{Z}} a_\alpha(P_i) \varphi_\alpha - \sum_{\alpha \in M_t} a_\alpha(\hat{P}_i) \varphi_\alpha \right\|_2^2 \right] \\
 &= \mathbb{E} \left[ \int_{\Lambda^l} \left( \sum_{\alpha \in M_t} (a_\alpha(P_i) - a_\alpha(\hat{P}_i)) \varphi_\alpha(x) \right. \right. \\
 & \quad \left. \left. + \sum_{\alpha \in M_t^c} a_\alpha(P_i) \varphi_\alpha(x) \right)^2 dx \right] \\
 &= \mathbb{E} \left[ \int_{\Lambda^l} \sum_{\alpha \in M_t} \sum_{\rho \in M_t} (a_\alpha(P_i) - a_\alpha(\hat{P}_i)) (a_\rho(P_i) - a_\rho(\hat{P}_i)) \right. \\
 & \quad \left. \varphi_\alpha(x) \varphi_\rho(x) dx \right] \\
 & \quad + 2 \mathbb{E} \left[ \int_{\Lambda^l} \sum_{\alpha \in M_t} \sum_{\rho \in M_t^c} (a_\alpha(P_i) - a_\alpha(\hat{P}_i)) a_\rho(P_i) \right. \\
 & \quad \left. \varphi_\alpha(x) \varphi_\rho(x) dx \right]
 \end{aligned}$$

$$\begin{aligned}
 & + \mathbb{E} \left[ \int_{\Lambda^l} \sum_{\alpha \in M_t^c} \sum_{\rho \in M_t^c} a_\alpha(P_i) a_\rho(P_i) \varphi_\alpha(x) \varphi_\rho(x) dx \right] \\
 = & \mathbb{E} \left[ \sum_{\alpha \in M_t} (a_\alpha(P_i) - a_\alpha(\hat{P}_i))^2 \right] + \mathbb{E} \left[ \sum_{\alpha \in M_t^c} a_\alpha^2(P_i) \right], \tag{27}
 \end{aligned}$$

where the last line follows from the orthonormality of  $\{\varphi\}_{\alpha \in \mathbb{Z}}$ . Furthermore, note that  $\forall P_i \in \mathcal{I}$ :

$$\begin{aligned}
 \sum_{\alpha \in M_t^c} a_\alpha^2(P_i) &= \frac{1}{t^2} \sum_{\alpha \in M_t^c} t^2 a_\alpha^2(P_i) \\
 &\leq \frac{1}{t^2} \sum_{\alpha \in \mathbb{Z}} \kappa_\alpha^2(\nu, \gamma) a_\alpha^2(P_i) \\
 &\leq \frac{A}{t^2}. \tag{28}
 \end{aligned}$$

Also,

$$\begin{aligned}
 \mathbb{E} \left[ (a_\alpha(P_i) - a_\alpha(\hat{P}_i))^2 \right] &= \left( \mathbb{E} \left[ a_\alpha(\hat{P}_i) \right] - a_\alpha(P_i) \right)^2 \\
 &\quad + \text{Var} \left[ a_\alpha(\hat{P}_i) \right].
 \end{aligned}$$

Clearly,  $a_\alpha(\hat{P}_i)$  is unbiased from (9). Also,

$$\begin{aligned}
 \text{Var} \left[ a_\alpha(\hat{P}_i) \right] &= \frac{1}{n_i^2} \sum_{j=1}^{n_i} \text{Var} [\varphi_\alpha(X_{ij})] \\
 &\leq \frac{n_i \varphi_{\max}^2}{n_i^2} \\
 &= O(n_i^{-1}),
 \end{aligned}$$

where  $\varphi_{\max} \equiv \max_{\alpha \in \mathbb{Z}^l} \|\varphi_\alpha\|_\infty$ . Thus,

$$\mathbb{E} [\|p_i - \tilde{p}_i\|_2^2] \leq \frac{C_1 |M_t|}{n_i} + \frac{C_2}{t^2}.$$

First note that if we have a bound  $\forall \alpha \in M_t$ ,  $|\alpha_i| \leq c_i$  then  $|M_t| \leq \prod_{i=1}^l (2c_i + 1)$ , by a simple counting argument. Let  $\lambda = \arg \min_i \nu_i^{2\gamma_i}$ . For  $\alpha \in M_t$  we have:

$$\sum_{i=1}^l |\alpha_i|^{2\gamma_i} \leq \frac{1}{\nu_\lambda^{2\gamma_\lambda}} \sum_{i=1}^l (\nu_i |\alpha_i|)^{2\gamma_i} = \frac{\kappa_\alpha^2(\nu, \gamma)}{\nu_\lambda^{2\gamma_\lambda}} \leq \frac{t^2}{\nu_\lambda^{2\gamma_\lambda}},$$

and

$$|\alpha_i|^{2\gamma_i} \leq \sum_{i=1}^l |\alpha_i|^{2\gamma_i} \leq t^2 \nu_\lambda^{-2\gamma_\lambda} \implies |\alpha_i| \leq \nu_\lambda^{-\frac{\gamma_\lambda}{\gamma_i}} t^{\frac{1}{\gamma_i}}.$$

Thus,  $|M_t| \leq \prod_{i=1}^l (2\nu_\lambda^{-\frac{\gamma_\lambda}{\gamma_i}} t^{\frac{1}{\gamma_i}} + 1)$ . Thus,  $|M_t| = O(t^{\gamma^{-1}})$  where  $\gamma^{-1} = \sum_{j=1}^l \gamma_j^{-1}$ . Hence,

$$\frac{\partial}{\partial t} \left[ \frac{C_1 t^{\gamma^{-1}}}{n_i} + \frac{C_2}{t^2} \right] = \frac{C_1' t^{\gamma^{-1}-1}}{n_i} - C_2' t^{-3} = 0 \implies$$

$$\begin{aligned}
 t &= C n^{\frac{1}{2+\gamma^{-1}}} \implies \\
 \mathbb{E} [\|p_i - \tilde{p}_i\|_2^2] &\leq \frac{C_1 |M_t|}{n_i} + \frac{C_2}{t^2} = O\left(n_i^{-\frac{2}{2+\gamma^{-1}}}\right).
 \end{aligned}$$

Furthermore, by (27) we may see that for  $G_i \in \mathcal{I}$ , if

$$\bar{g}_i = \sum_{\alpha \in \mathbb{Z}} a_\alpha(G_i) \varphi_\alpha,$$

then

$$\mathbb{E} [\|g_i - \bar{g}_i\|_2^2] = O\left(n_i^{-\frac{2}{2+\gamma^{-1}}}\right).$$
